# Supplementary material for: Computational Insights into the Inhibitory Mechanism of Human AKT1 by an Orally Active Inhibitor, MK-2206
Source: PubMed Central journal article supplement (PMC4201482; doi:10.1371/journal.pone.0109705), 2014-10-17

## **R<sub>1</sub>-analogs of MK-2206**

Ligand-interaction plots of R<sub>1</sub>-analogs of MK-2206 are shown. The MK-2206 analogs' names are indicated by PubChem ID. The hydrogen bonds are shown as green-dashed lines with indicated bond length and the residues involved in hydrophobic interactions are shown as red arcs. The residues which are common to the first compound, the drug MK-2206 are encircled.

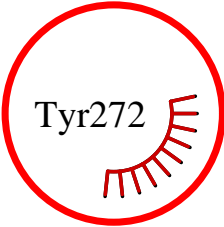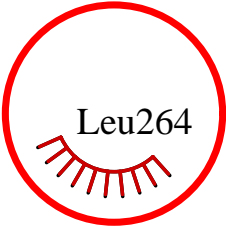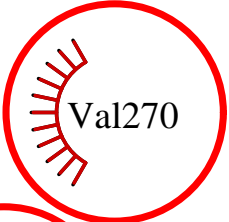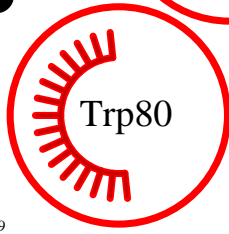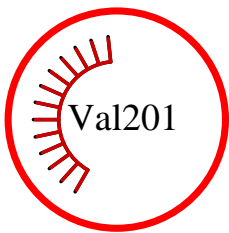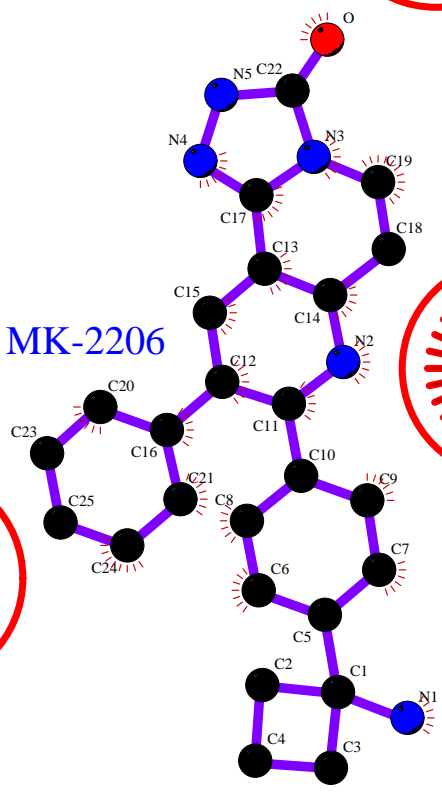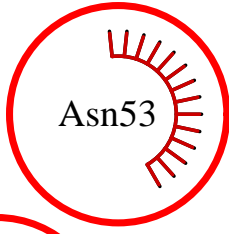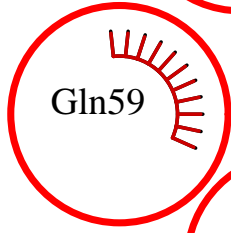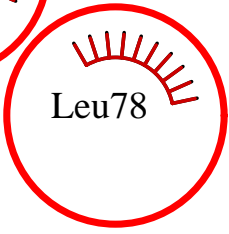

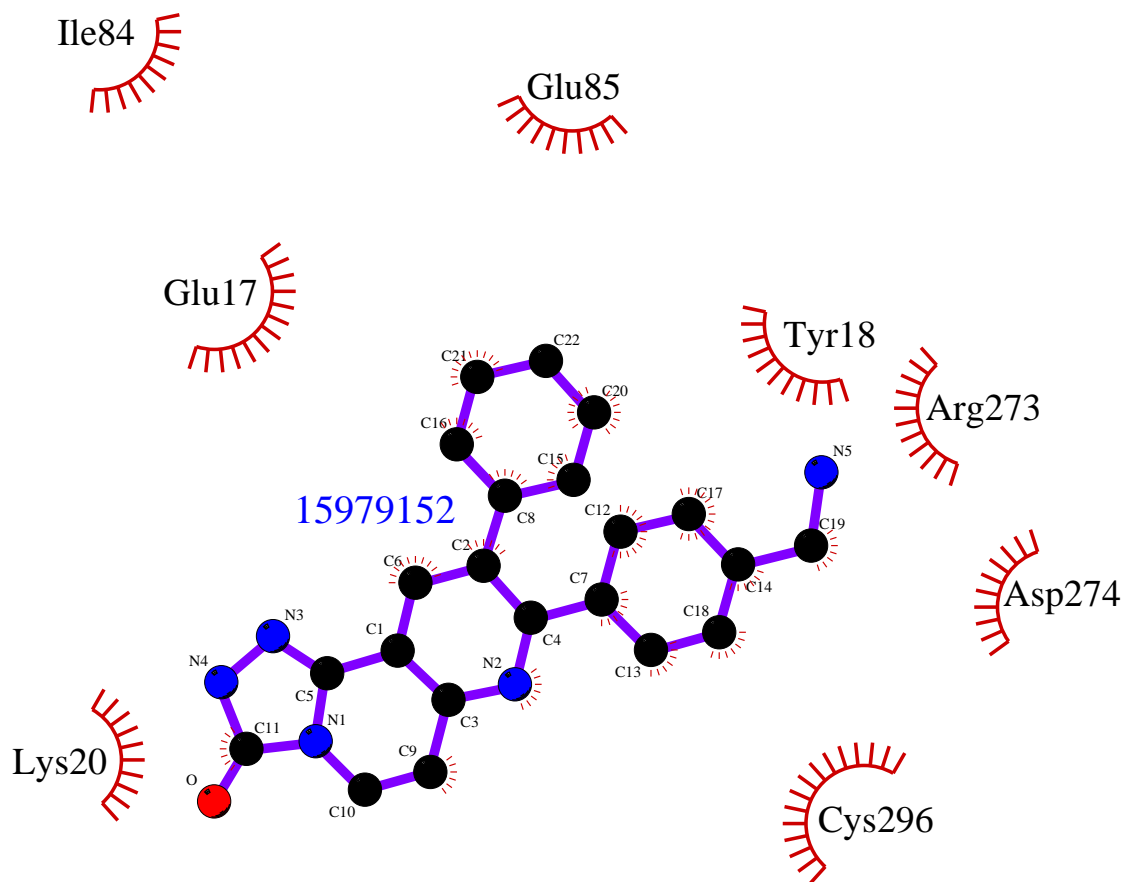

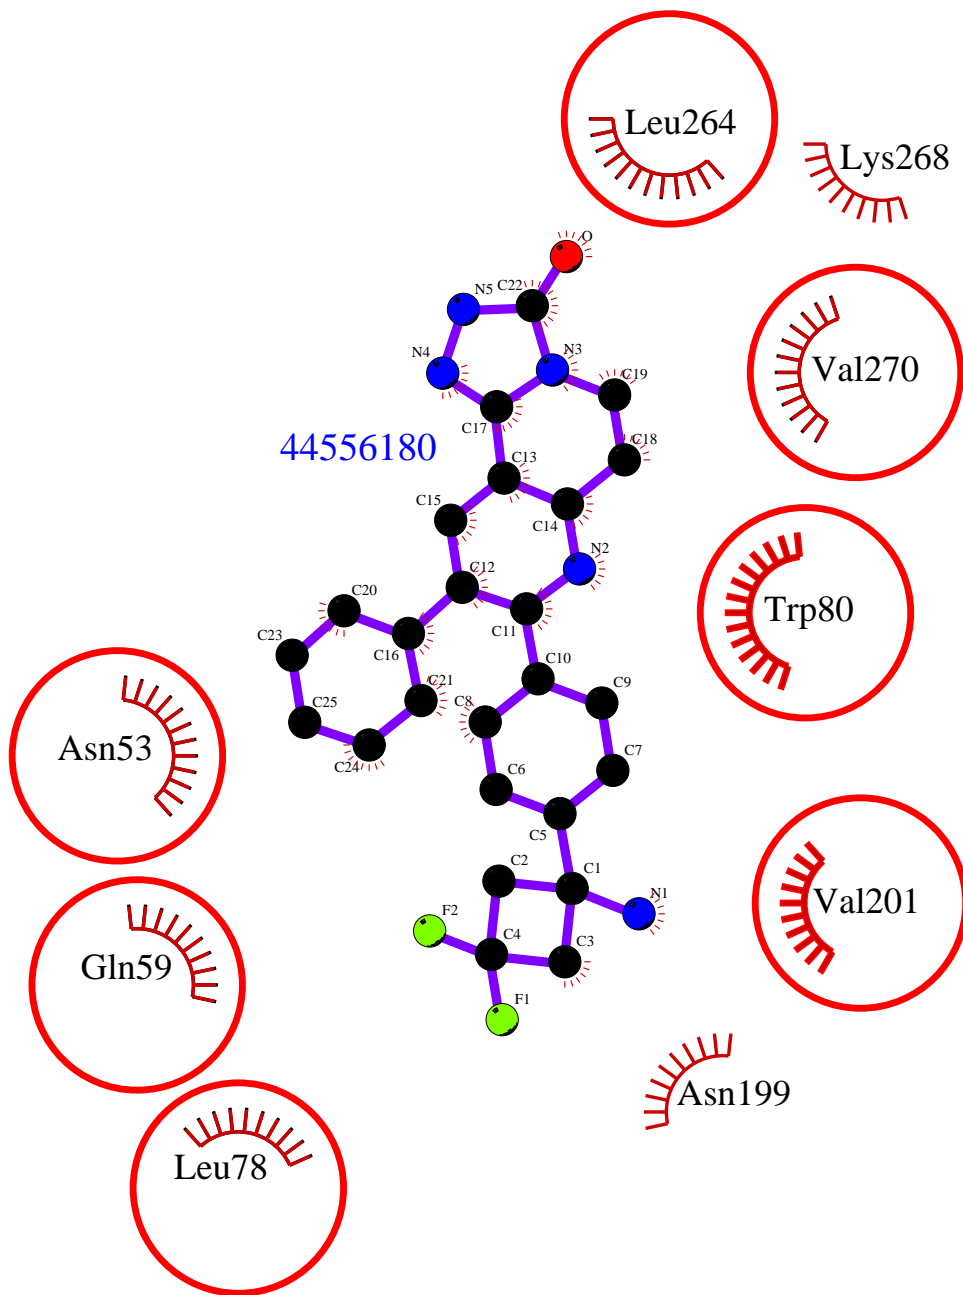

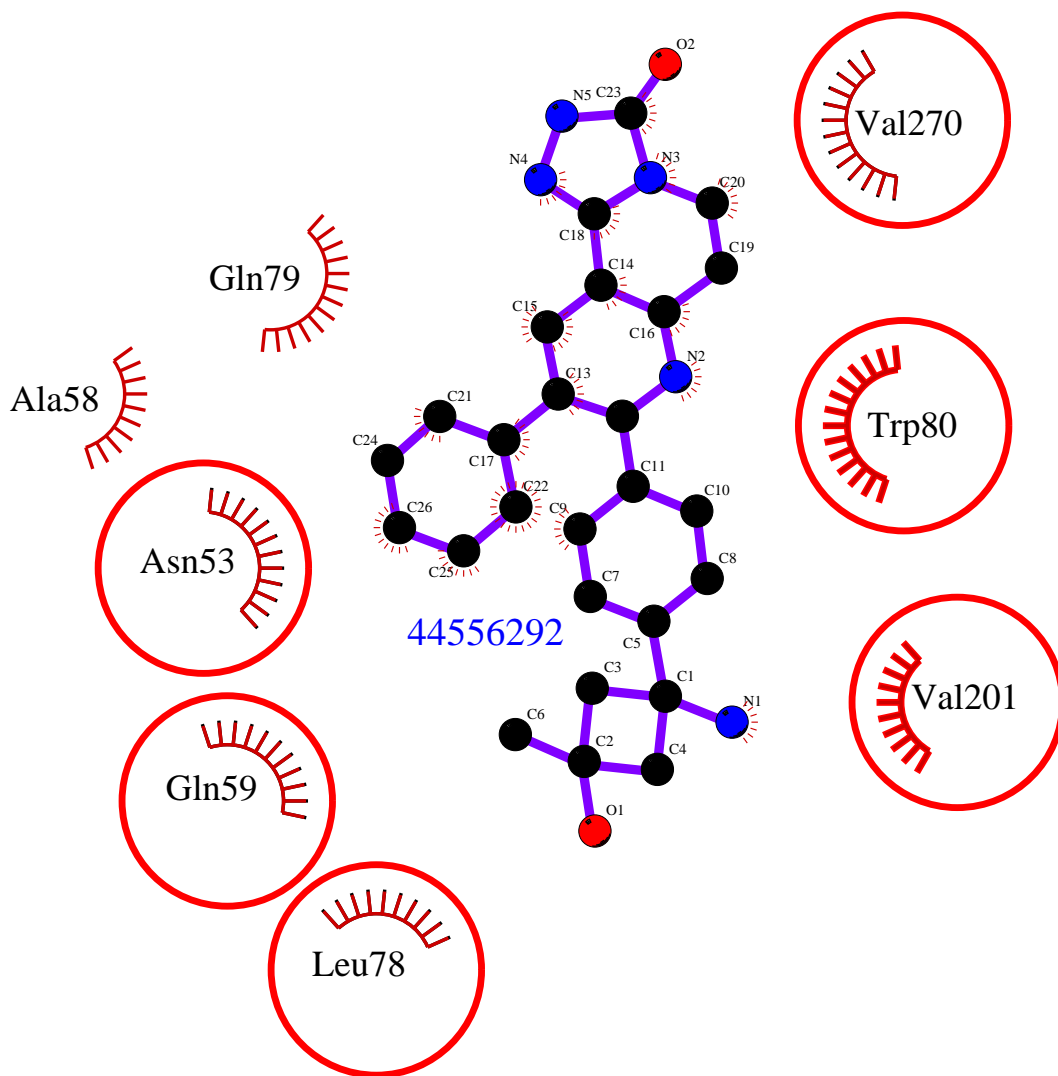

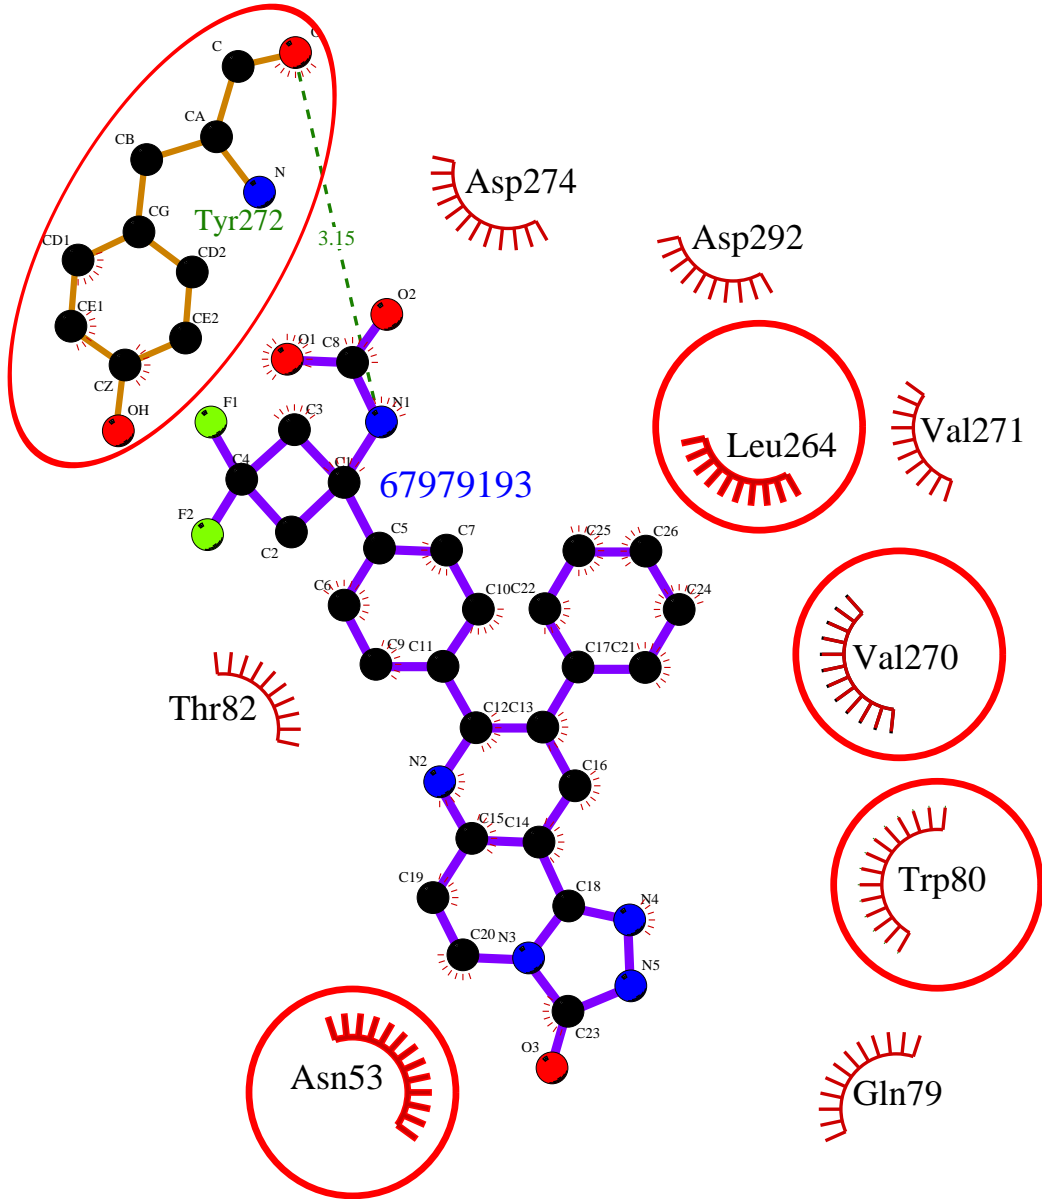

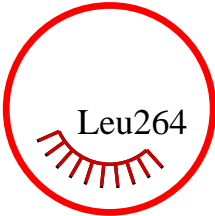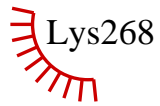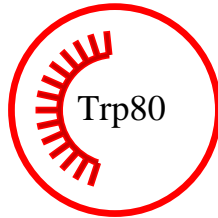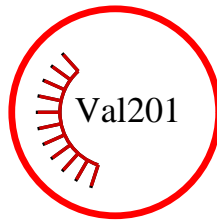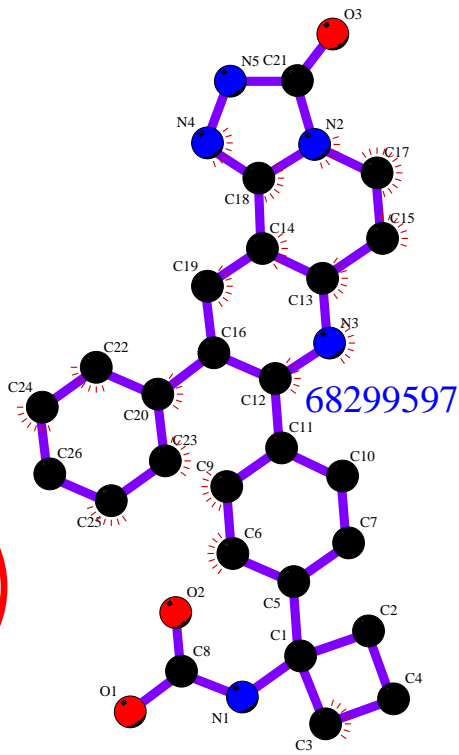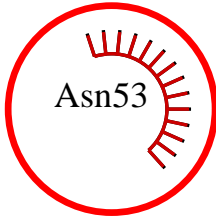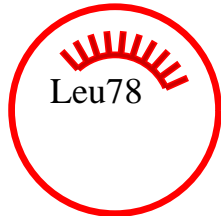

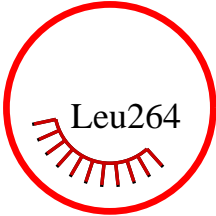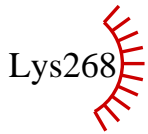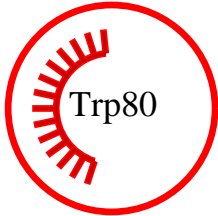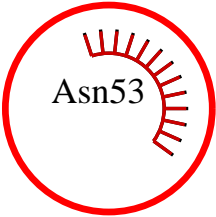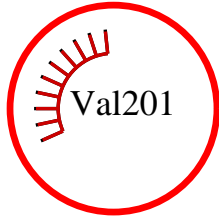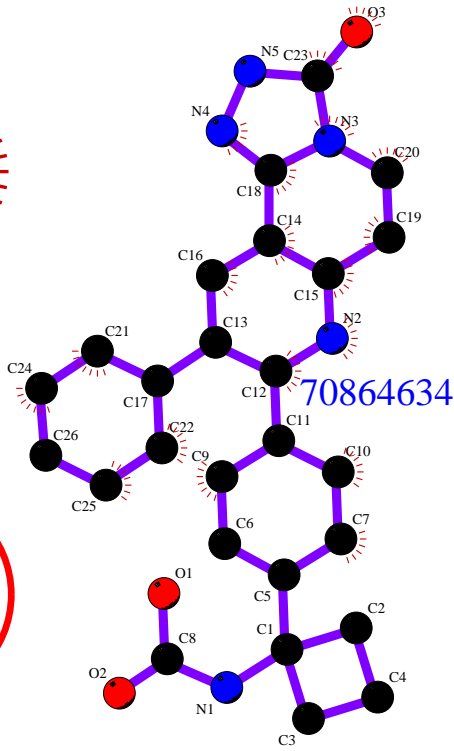

Supplement: pone.0109705.s001.pdf [file pone.0109705.s001.pdf]
